# Supplementary material
Source: publisher figshare collection journal article supplement (https://acs.figshare.com/ndownloader/files/4021816)
Supplement: Supplementary file 1 [file 4021816]

## Supporting Information

### Probing the Effects of Cysteine Residues on Protein Adsorption onto Gold Nanoparticles using Wild-type and Mutated GB3 Proteins

*Kumudu Siriwardana<sup>+</sup>, Ailin Wang<sup>+</sup>, Karthikeshwar Vangala<sup>+</sup>, Nicholas Fitzkee<sup>+</sup> and  
Dongmao Zhang<sup>+,\*</sup>*

<sup>+</sup> Department of Chemistry, Mississippi State University, Mississippi State, Mississippi  
39762, United States

| <b>Contents:</b>                                                                                        | <b>Page</b> |
|---------------------------------------------------------------------------------------------------------|-------------|
| <b>S1.</b> TEM image and UV-Vis absorption spectrum of the as-synthesized gold nanoparticles            | S3          |
| <b>S2.</b> Complete $^{15}\text{N}$ TROSY-HSQC comparison between GB3 <sub>0</sub> and GB3 <sub>1</sub> | S4          |
| <b>S3.</b> Stability of (AuNP/PEG <sub>1</sub> ) mixture upon organothiol adsorption                    | S5          |

**S1. TEM image and UV-Vis absorption spectrum of the as-synthesized gold nanoparticles**

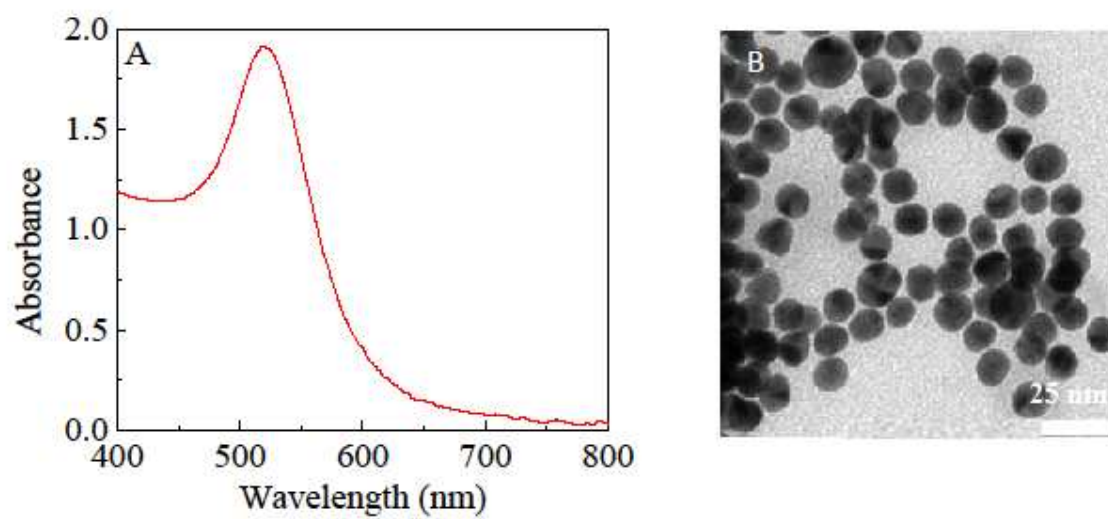

**Figure S1.** (A) UV-Vis spectrum of the two-time diluted AuNPs, and (B) TEM image of the as-synthesized AuNPs.

## S2. Complete $^{15}\text{N}$ TROSY-HSQC comparison between GB3<sub>0</sub> and GB3<sub>1</sub>

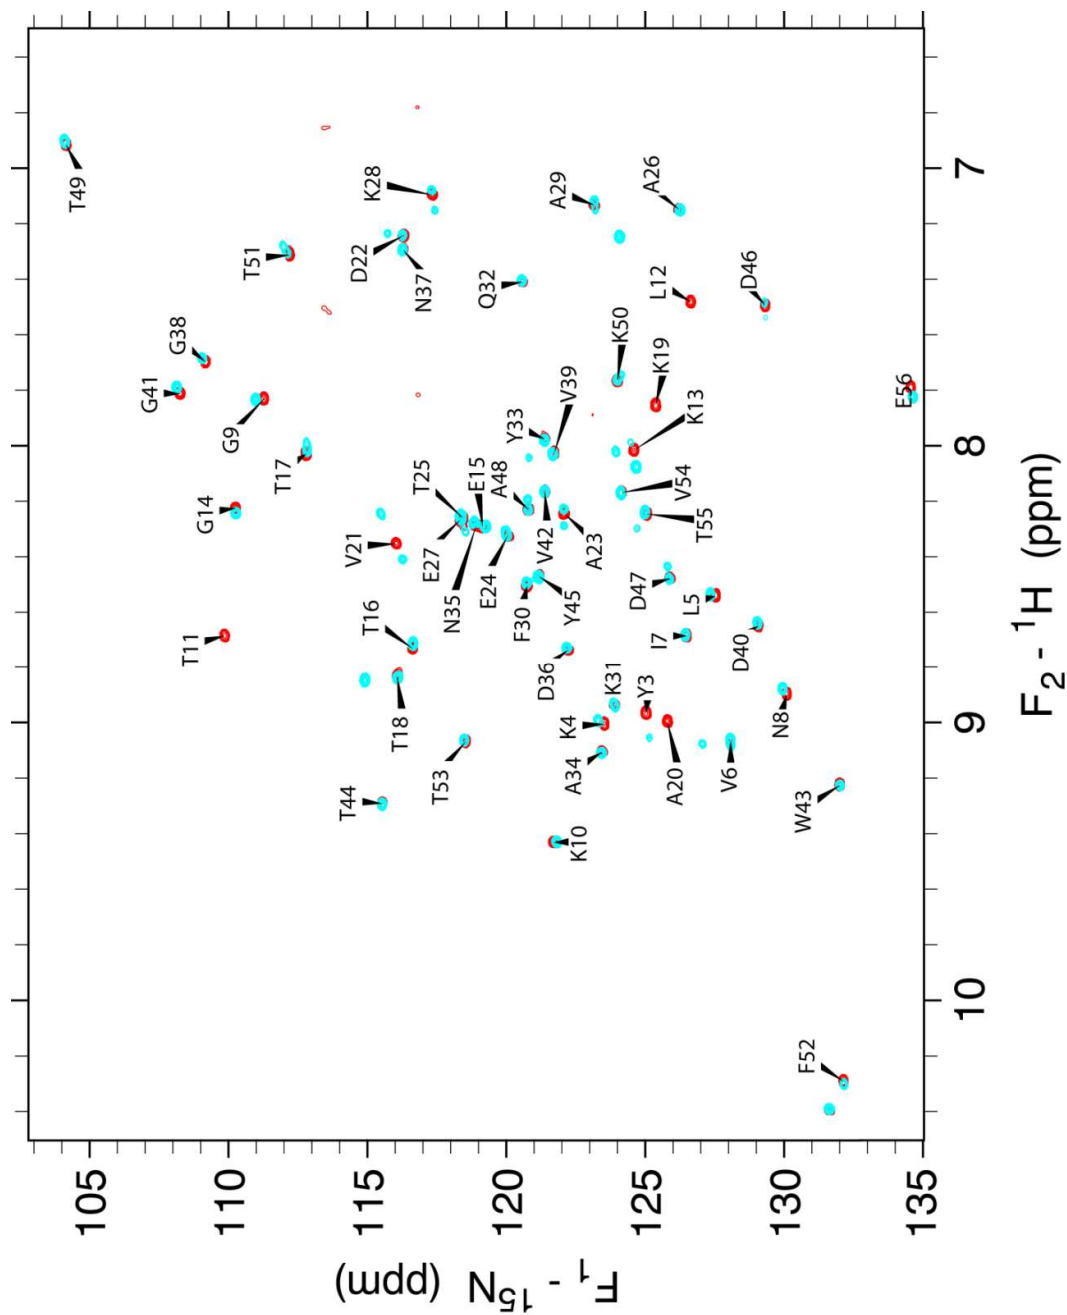

**Figure S2.** Complete  $^{15}\text{N}$  TROSY-HSQC comparison between WT GB3 (red) and T11C K19C (cyan). Only residues near mutation sites show significant shifts, suggesting that the topology of the two proteins are similar.

### S3. Stability of (AuNP/PEG<sub>1</sub>) mixture upon organothiol adsorption

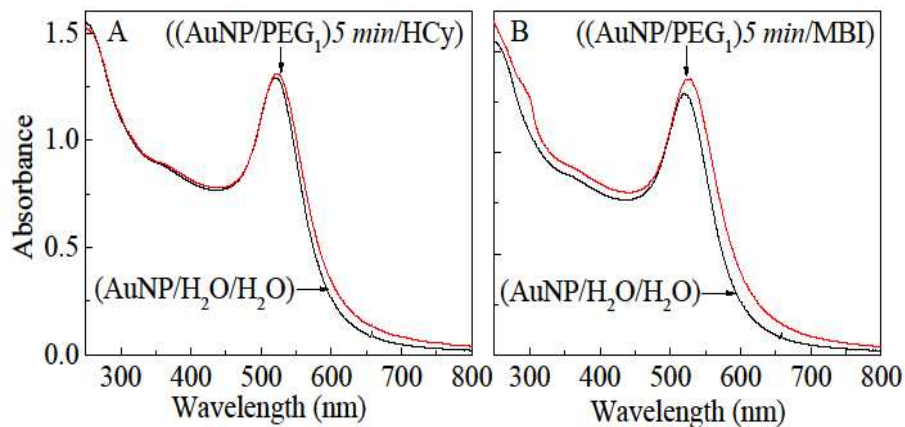

**Figure S3.** UV-Vis spectra of (A) ((AuNP/PEG<sub>1</sub>)5 min /Hcy) and (B) ((AuNP/PEG<sub>1</sub>)5 min /MBI). The samples were prepared by mixing equal volume of as-synthesized AuNPs, 30  $\mu$ M PEG<sub>1</sub>, and 30  $\mu$ M OTs. The black spectra in both plots were obtained with the AuNP control where the as-synthesized AuNPs were diluted with water by 3 times. ((AuNP/PEG<sub>1</sub>)5 min /OT) spectrum was acquired 24 hrs after the OT addition. The lacking of the significant red-shift in the AuNP LSPR peak in the ((AuNP/PEG<sub>1</sub>)5min/OT) samples indicates that the AuNP is stabilized by PEG<sub>1</sub>.
